# Supplementary material for: A Retrospective Analysis of 10 Years of Liver Surveillance Undertaken in Uveal Melanoma Patients Treated at the Supraregional “Liverpool Ocular Oncology Centre”, UK
Source: MDPI journal article supplement (doi:10.3390/cancers14092187), 2022-04-27
Supplement: s1 [file s1]

# Supplementary Material: A Retrospective Analysis of 10 Years of Liver Surveillance Undertaken in Uveal Melanoma Patients Treated at the Supraregional “Liverpool Ocular Oncology Centre”, UK

Alda Rola, Helen Kalirai, Azzam F. G. Taktak, Antonio Eleuteri, Yamini Krishna, Rumana Hussain, Heinrich Heimann and Sarah E. Coupland

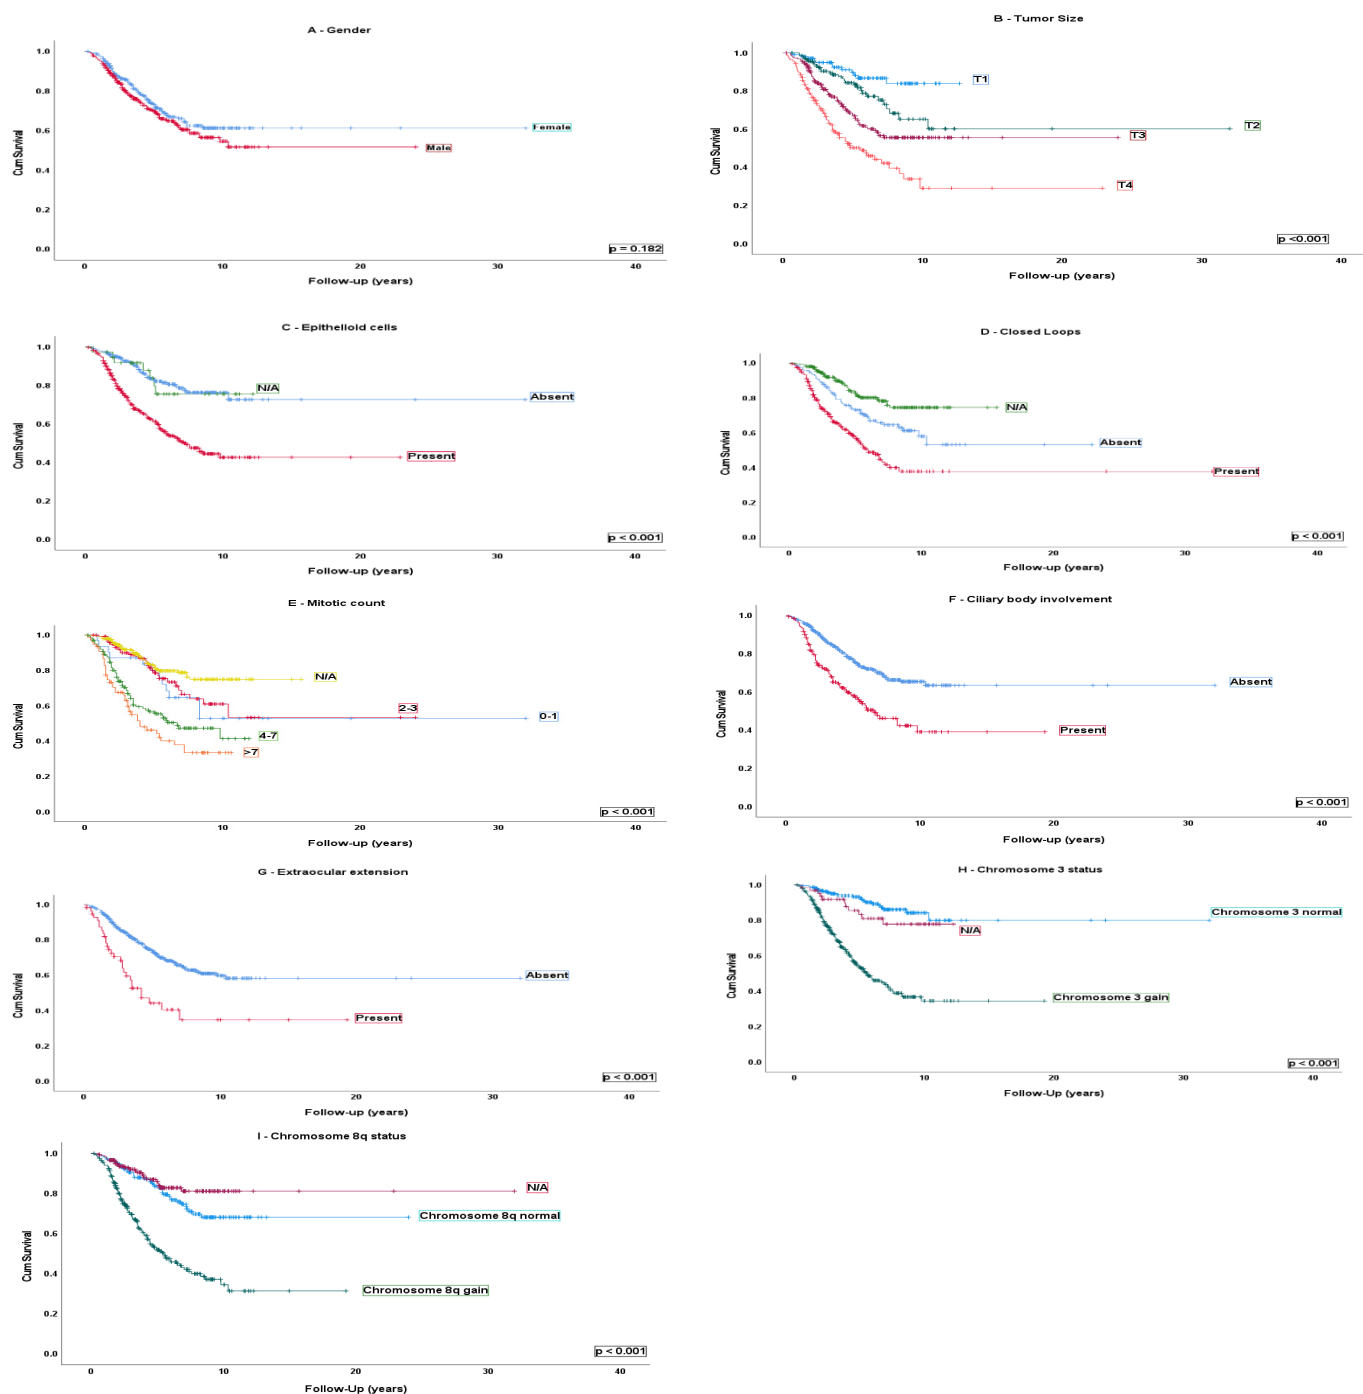

**Figure S1:** Kaplan-Meier plots (A-I). Overall survival for all patients stratified according to all predictor factors related to LUMPO3. All these predictor factors were associated to poor survival and metastatic mortality. A – Male gender, B – Increasing tumor size, C – presence of epithelioid cells, D – presence of closed loops, E – High mitotic count, F – Ciliary body involvement, G – Extraocular extension, H – Chromosome 3 alterations, I – Chromosome 8q alterations.

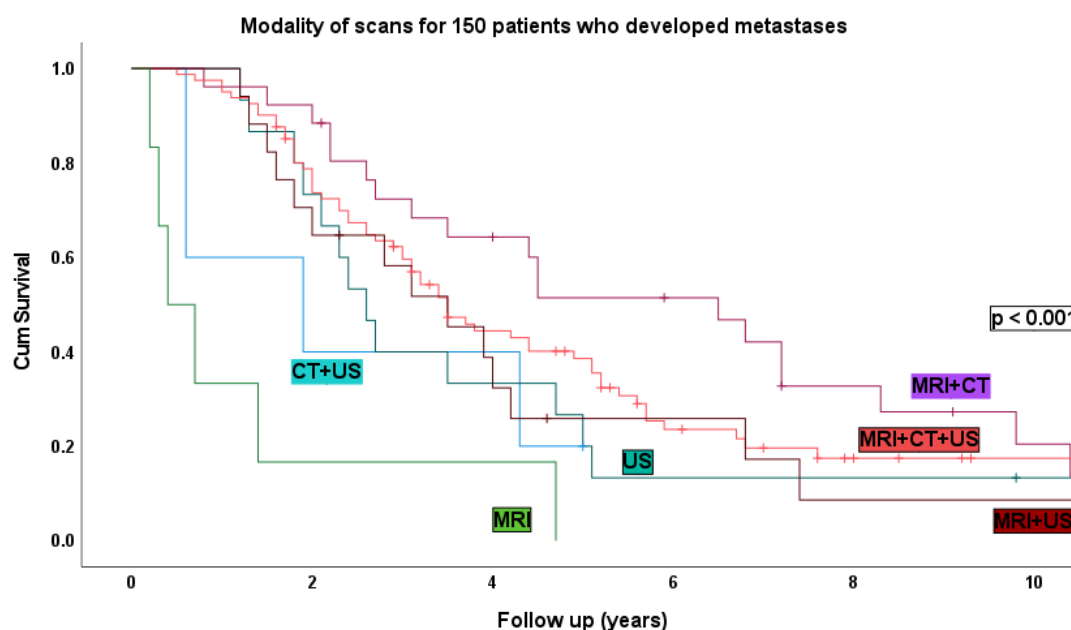

| Modality of scans | Number of patients | (%)   | Number of Scans | (%)    | Number of Events | (%)    | Censored | (%)     | Median survival (years) | 95% confidence interval |       |
|-------------------|--------------------|-------|-----------------|--------|------------------|--------|----------|---------|-------------------------|-------------------------|-------|
|                   |                    |       |                 |        |                  |        |          |         |                         | Lower                   | Upper |
| MRI               | 15                 | (10%) | 74              | (5%)   | 13               | (87%)  | 2        | (13.3%) | 2.600                   | 2.095                   | 3.105 |
| US                | 6                  | (4%)  | 6               | (0.4%) | 6                | (100%) | 0        | (0%)    | 0.400                   | 0.000                   | 0.880 |
| MRI + CT          | 26                 | (17%) | 297             | (19%)  | 19               | (73%)  | 7        | (26.9%) | 6.500                   | 3.817                   | 9.183 |
| MRI + US          | 17                 | (11%) | 129             | (8%)   | 14               | (82%)  | 3        | (17.6%) | 3.500                   | 2.123                   | 4.877 |
| CT + US           | 5                  | (3%)  | 27              | (1.7%) | 4                | (80%)  | 1        | (20.0%) | 1.900                   | 0.000                   | 4.691 |
| MRI + CT + US     | 81                 | (50%) | 1067            | (67%)  | 59               | (73%)  | 22       | (27.2%) | 3.500                   | 2.875                   | 4.125 |
| Overall           | 150                |       | 1600            |        | 115              | (77%)  | 35       | (23.3%) | 3.500                   | 2.875                   | 4.125 |

**Figure S2.** Kaplan-Meier survival curve and table where 150 UM patients with metastases. detected through liver surveillance were stratified according to the modality of scan performed. MRI: 15 patients underwent 74 scans; US: 6 patients underwent 6 scans; MRI+CT: 26 patients underwent 297 scans; MRI+US: 17 patients underwent 129 scans; CT+US: 5 patients underwent 27 scans; MRI+CT+US: 81 patients underwent 1067 scans. Number of events indicates the number of deaths from metastatic disease.

Modality of scans for 386 patients who never demonstrate metastases

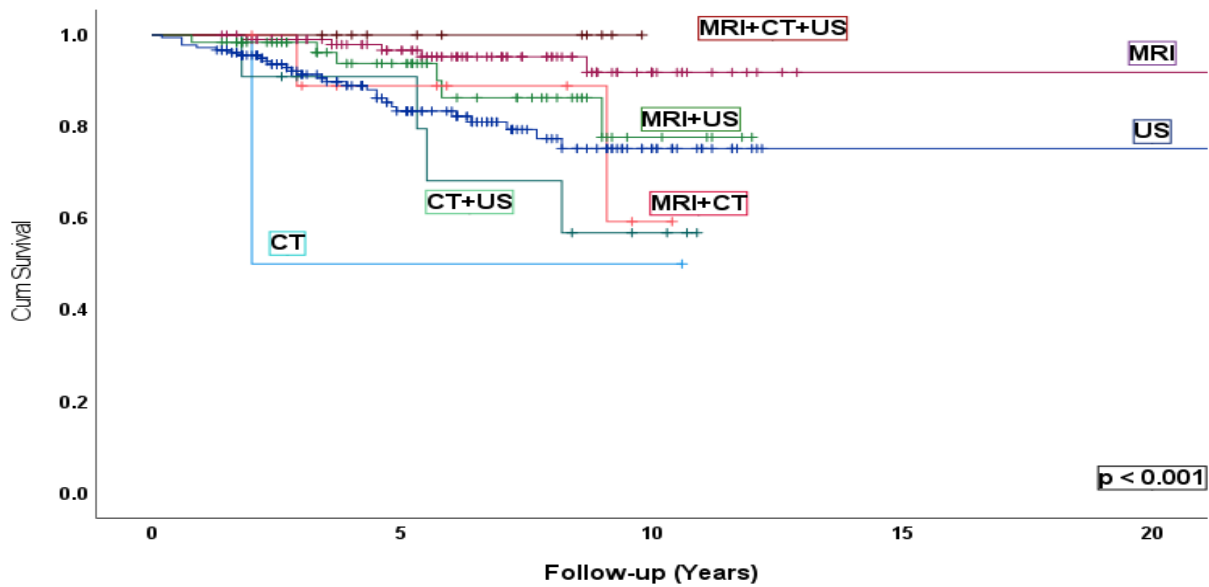

| Modality of scans | Number of patients | (%)    | Number of Scans | (%)    | Number of Events | (%)    | Censored | (%)     | Median survival (years) | 95% confidence interval |       |
|-------------------|--------------------|--------|-----------------|--------|------------------|--------|----------|---------|-------------------------|-------------------------|-------|
|                   |                    |        |                 |        |                  |        |          |         |                         | Lower                   | Upper |
| MRI               | 107                | (28%)  | 871             | (41%)  | 5                | (87%)  | 102      | (95.3%) | -                       | -                       | -     |
| CT                | 2                  | (0.5%) | 6               | (0.3%) | 1                | (2.1%) | 1        | (50.0%) | -                       | -                       | -     |
| US                | 183                | (47%)  | 456             | (22%)  | 28               | (100%) | 155      | (84.7%) | -                       | -                       | -     |
| MRI + CT          | 10                 | (3%)   | 103             | (5%)   | 2                | (73%)  | 8        | (80.0%) | -                       | -                       | -     |
| MRI + US          | 62                 | (16%)  | 488             | (23%)  | 6                | (82%)  | 56       | (90.3%) | -                       | -                       | -     |
| CT + US           | 11                 | (3%)   | 53              | (3%)   | 4                | (80%)  | 7        | (63.6%) | -                       | -                       | -     |
| MRI + CT + US     | 11                 | (3%)   | 137             | (6%)   | 0                | (73%)  | 11       | (100%)  | -                       | -                       | -     |
| Overall           | 386                |        | 2114            |        | 46               | (77%)  | 340      | (80.1%) | -                       | -                       | -     |

**Figure S3.** “Kaplan-Meier survival curve and table where 386 UM patients who never demonstrated metastases were stratified according to the modality of scan performed”. MRI: 107 patients underwent 871 scans; CT: 2 patients underwent 6 scans; US: 183 patients underwent 456scans; MRI+CT: 10 patients underwent 103 scans; MRI+US: 62 patients underwent 488 scans; CT+US: 11 patients underwent 53 scans; MRI+CT+US: 11 patients underwent 137 scans. No survival statistics because all cases are censored. Number of events indicates the number of deaths.

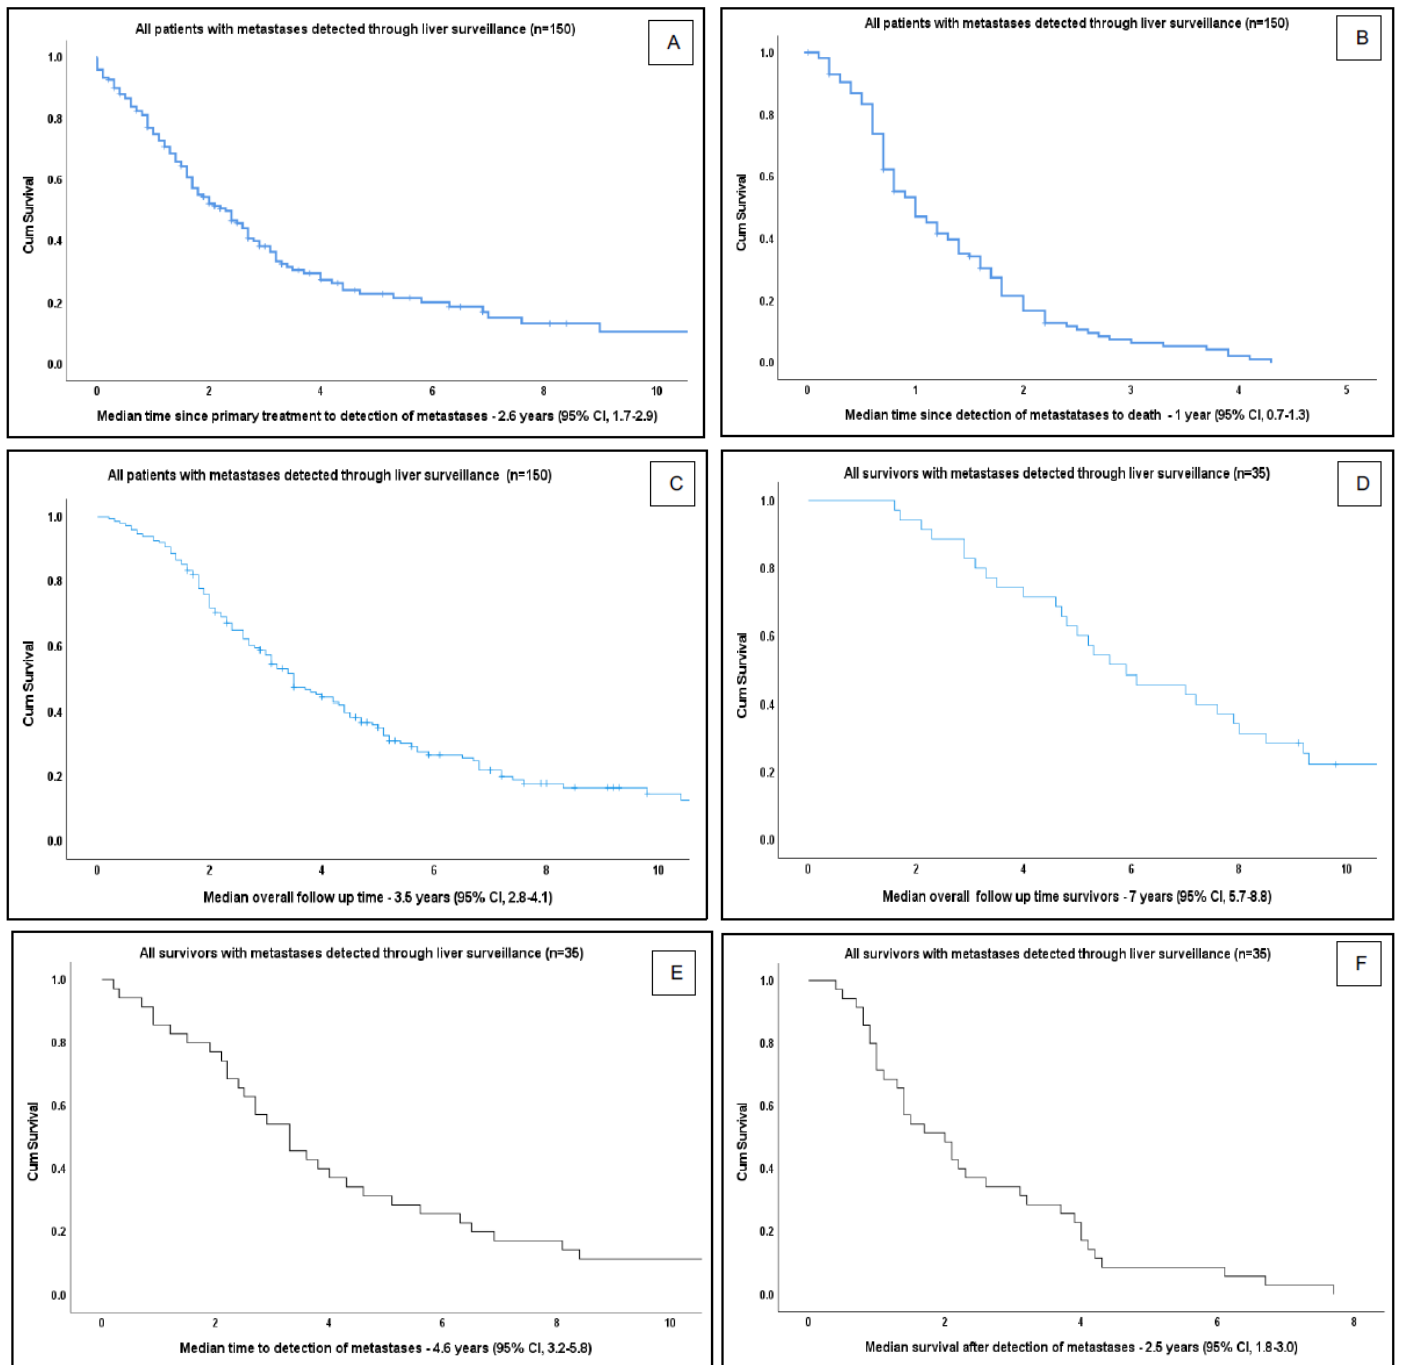

**Figure S4.** Kaplan Meier estimates for all 150 metastatic UM patients from primary treatment to detection of metastases, and from metastatic disease to death. A) Median time to detection of metastases. B) Median time from detection of metastases to death. C) Median follow-up time for all patients. D) Median overall follow-up time for survivors. E) Median time to detection of metastases for survivors. F) Median follow up time for survivors after detection of metastases.

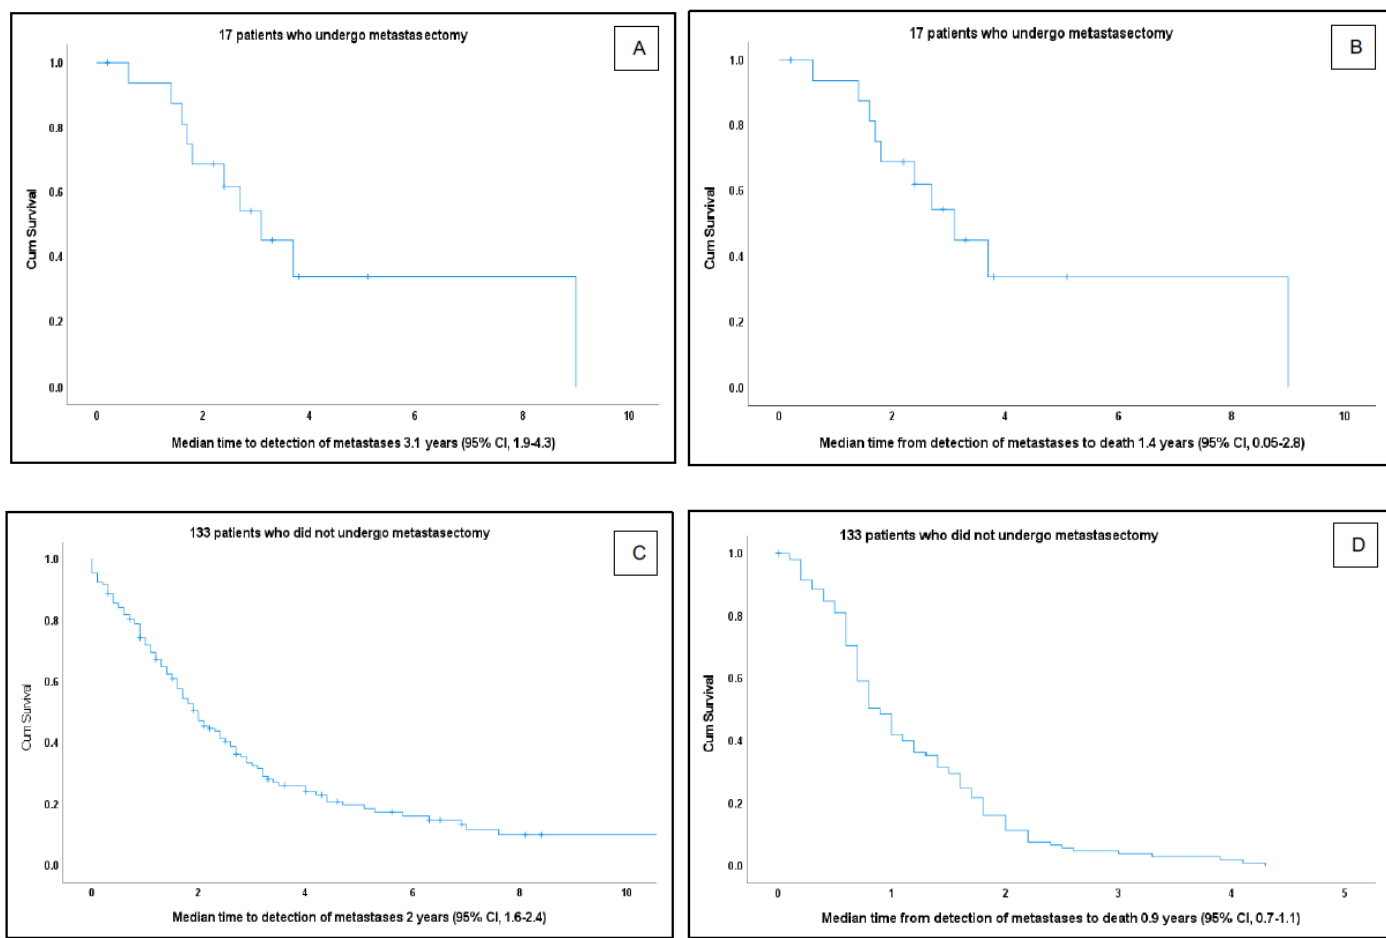

**Figure S5.** Kaplan-Meier estimates for all 150 metastatic UM patients stratified according to type of treatment post diagnosis of metastases. Metastasectomy was performed in 17 patients, while in the remaining 133 patients no metastasectomy event was recorded. Patients undergoing metastasectomy: A) Median time to detection of metastases, B) Median time from detection of metastases to death. Patients who did not undergo metastasectomy: C) Median time to detection of metastases, D) median time from detection of metastases to death.

**Metastatic UM stratified according to the type of treatment post detection of metastases (n=150)**

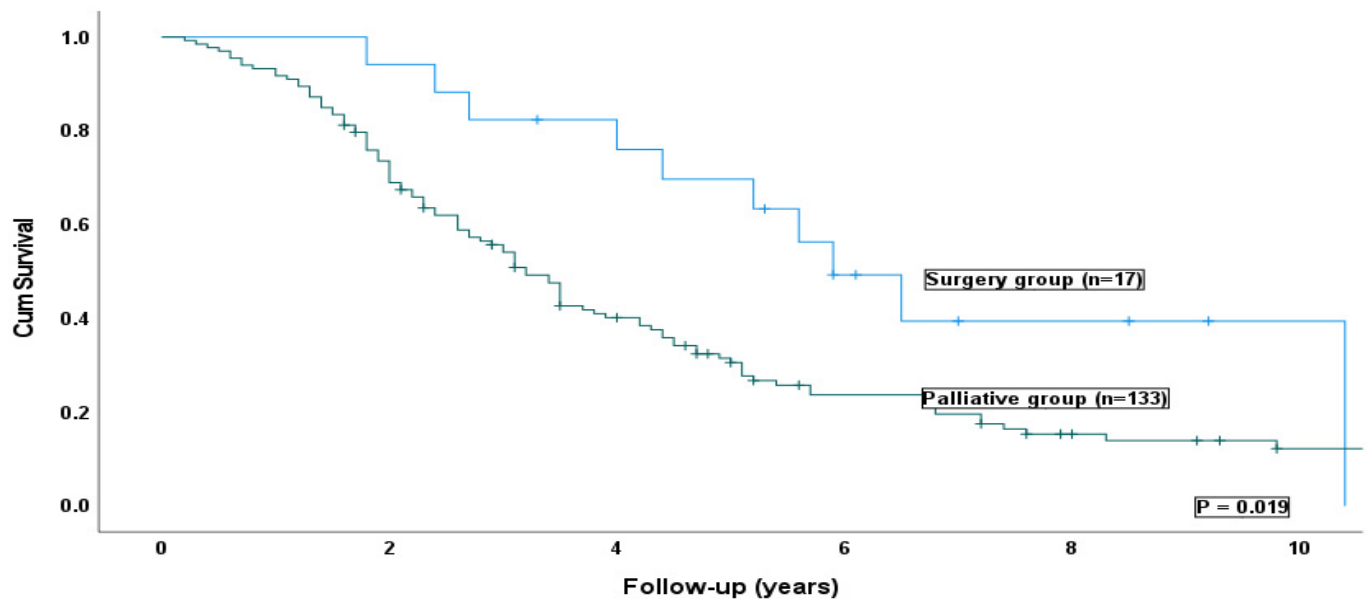

| Groups     | Number of patients (%) |      | Number of events % |     | Censored % |       | Sig.      | Median survival (years) | 95% confidence interval |       |
|------------|------------------------|------|--------------------|-----|------------|-------|-----------|-------------------------|-------------------------|-------|
|            |                        |      |                    |     |            |       |           |                         | Lower                   | Upper |
| Surgery    | 17                     | 11%  | 10                 | 59% | 7          | 41.2% | P = 0.019 | 5.900                   | 4.564                   | 7.236 |
| Palliative | 133                    | 89%  | 105                | 79% | 28         | 21.1% | P = 0.019 | 3.200                   | 2.803                   | 3.597 |
| Overall    | 150                    | 100% | 115                | 77% | 35         | 23.3% |           | 3.500                   | 2.875                   | 4.125 |

**Figure S6.** Kaplan-Meier survival curve and table for all metastatic UM stratified according to the type of treatment post detection of metastases. Patients were classified as: Surgery group ( $n = 17$ ), and palliative group ( $n = 133$ ), ( $p = 0.019$ ).

**Table S1.** Summary of studies reporting outcome of UM metastatic disease.

| Parameters                                | Studies                                                                                                                |                                                         |                                                |                                                                               |                                                                                            |
|-------------------------------------------|------------------------------------------------------------------------------------------------------------------------|---------------------------------------------------------|------------------------------------------------|-------------------------------------------------------------------------------|--------------------------------------------------------------------------------------------|
|                                           | Cunha Rola et al.                                                                                                      | Rietschel et al.                                        | Rivoire et al.                                 | Lane et al.                                                                   | Lorigan et al.                                                                             |
| <b>Name of the Study</b>                  | A retrospective analysis of 10 years of liver surveillance undertaken in UM patients treated at the supraregional LOOC | Variates of survival in metastatic UM                   | Treatment of liver metastases from UM          | Survival rates in patients after treatment for metastases from UM             | The prevalence and location of metastases from ocular melanoma: Imaging study 110 patients |
| <b>Number of UM patients</b>              | 615 UM patients                                                                                                        | 119 (stage IV UM)                                       | 602                                            | 3063                                                                          | 181                                                                                        |
| <b>Time of the study</b>                  | 11 years                                                                                                               | 10 years                                                | 14 years                                       | 27 years                                                                      | 12 years                                                                                   |
| <b>Metastatic disease</b>                 | Total 229 (37%) UM metastases:<br>150 (66%) imaging<br>79 (34%) post-mortem                                            | 119 – UM metastases<br>77% - liver<br>43% - other sites | 10.5% UM metastases                            | 661 (21.6%)<br>12 (1.8%) excluded<br>87 (13%) no data<br>562 (85%) Metastases | 110 (60.7%) MUM<br>101 (92%) liver + other sites<br>60 (55%) only liver                    |
| <b>Metastases at time of diagnosis UM</b> | 7 (2.4%)                                                                                                               | N/A                                                     | N/A                                            | 12 (1.8%) metastases within 6 months                                          | 3 (2.7%)                                                                                   |
| <b>Parameters of the study</b>            | Diagnosed by imaging 65.5 %<br>Diagnosed at autopsy 34.5 %                                                             | Diagnosed symptoms 40%<br>Diagnosed imaging/others 60%  | 44% Liver surgery<br>56% Systemic chemotherapy | 53% received treatment<br>47% untreated                                       | Clinical and radiology reports                                                             |

|                                                  |                                                                                |                                                                      |                                                                       |                                                                                     |                                                    |
|--------------------------------------------------|--------------------------------------------------------------------------------|----------------------------------------------------------------------|-----------------------------------------------------------------------|-------------------------------------------------------------------------------------|----------------------------------------------------|
| <b>Time to metastases</b>                        | 2.6 years (0.1-17.8)                                                           | 4.4 years (0-29.9)                                                   | 2.4 years                                                             | 3.45 years                                                                          | 4.3 years (0.2-36)                                 |
| <b>Time to death</b>                             | 12 months (1-52 months)<br>< 2 years – 85%<br>2-3 years - 10%<br>>3 years – 5% | 9.5 months - Systemic treatment<br>32.4 months -Surgery/intrahepatic | 13 months (2.5-110)<br>1 year – 59%<br>2 years – 29%<br>4 years – 13% | 12 months– 21%<br>1.5 years – 11%<br>3 years – 4%                                   | 10 months (1-38) – 96%                             |
| <b>Median survival after metastases</b>          | 12 months<br>(95% CI, 0.7-1.3)                                                 | 12.5 months<br>(95% CI, 9.5-15.7 months)                             | 15 months<br>(3-110 months)                                           | 3.9 months – received treatment<br>1.7 months – no treatment                        | N/A                                                |
| <b>Overall survival patients with metastases</b> | 3.5 years (95% CI, 2.8-4.1)                                                    | N/A                                                                  | 3.9 years (0.3-15.8)                                                  | 8.9 years<br>(0.1-29.6 years)                                                       | N/A                                                |
| <b>Survivors</b>                                 | (23.3%)                                                                        | (22%)                                                                | (15.9%)                                                               | (30.2%) treated alive<br>(5.6%) untreated alive<br><u>After 1 year of treatment</u> | (4.5%)<br>(2.7%) – 22 months<br>(1.8%) – 74 months |
| <b>Median Follow-up survivors</b>                | 30 months<br>(4-92 months)                                                     | 17 months<br>(0-96 months)                                           | 29 months<br>(16-110 months)                                          | N/A                                                                                 | N/A                                                |
